# Supplementary material for: Effects of Gas Composition on the Lipid Oxidation and Fatty Acid Concentration of Tilapia Fillets Treated with In-Package Atmospheric Cold Plasma
Source: MDPI journal article supplement (doi:10.3390/foods13010165), 2024-01-03
Supplement: s1 [file s1]

**Table S1.** The sensory evaluation standard of the tilapia fillets.

| Sensory<br>Characteristics | Score                                          |                                  |                                            |                                                |                                               |
|----------------------------|------------------------------------------------|----------------------------------|--------------------------------------------|------------------------------------------------|-----------------------------------------------|
|                            | 5                                              | 4                                | 3                                          | 2                                              | 1                                             |
| Brightness                 | Very brigh                                     | Bright                           | Slightly dim                               | Partially dim                                  | Dim                                           |
| Color                      | Very nice bright<br>white                      | Bright white                     | White                                      | Slightly gray                                  | Grayish white,<br>partially yellow            |
| Texture                    | Complete, the<br>texture is very clear         | Compact, the<br>texture is clear | Not tight, the<br>texture is clear         | Not tight, the<br>texture is loose             | Not tight, the texture<br>is completely loose |
| Muscle<br>elasticity       | Tight, very good<br>elasticity                 | Tight, elasticity                | Little soft,<br>insufficient<br>elasticity | Soft, poor<br>elasticity                       | Loose, elasticity<br>disappears               |
| Odor                       | No peculiar odor,<br>very light fishy<br>smell | No peculiar<br>odor, fishy smell | No peculiar odor,<br>strong fishy smell    | Slightly peculiar<br>odor, rich fishy<br>smell | Strong odor, foul<br>smell                    |
